# Supplementary material for: Evaluation of modelled climatologies of O 3 , CO, water vapour and NO y in the upper troposphere – lower stratosphere using regular in situ observations by passenger aircraft
Source: Copernicus journal article supplement (doi:10.5194/egusphere-2023-572), 2023-05-22
Supplement: Supplementary file 1 [file egusphere-2023-572-supplement.pdf]

## O<sub>3</sub> – DJF

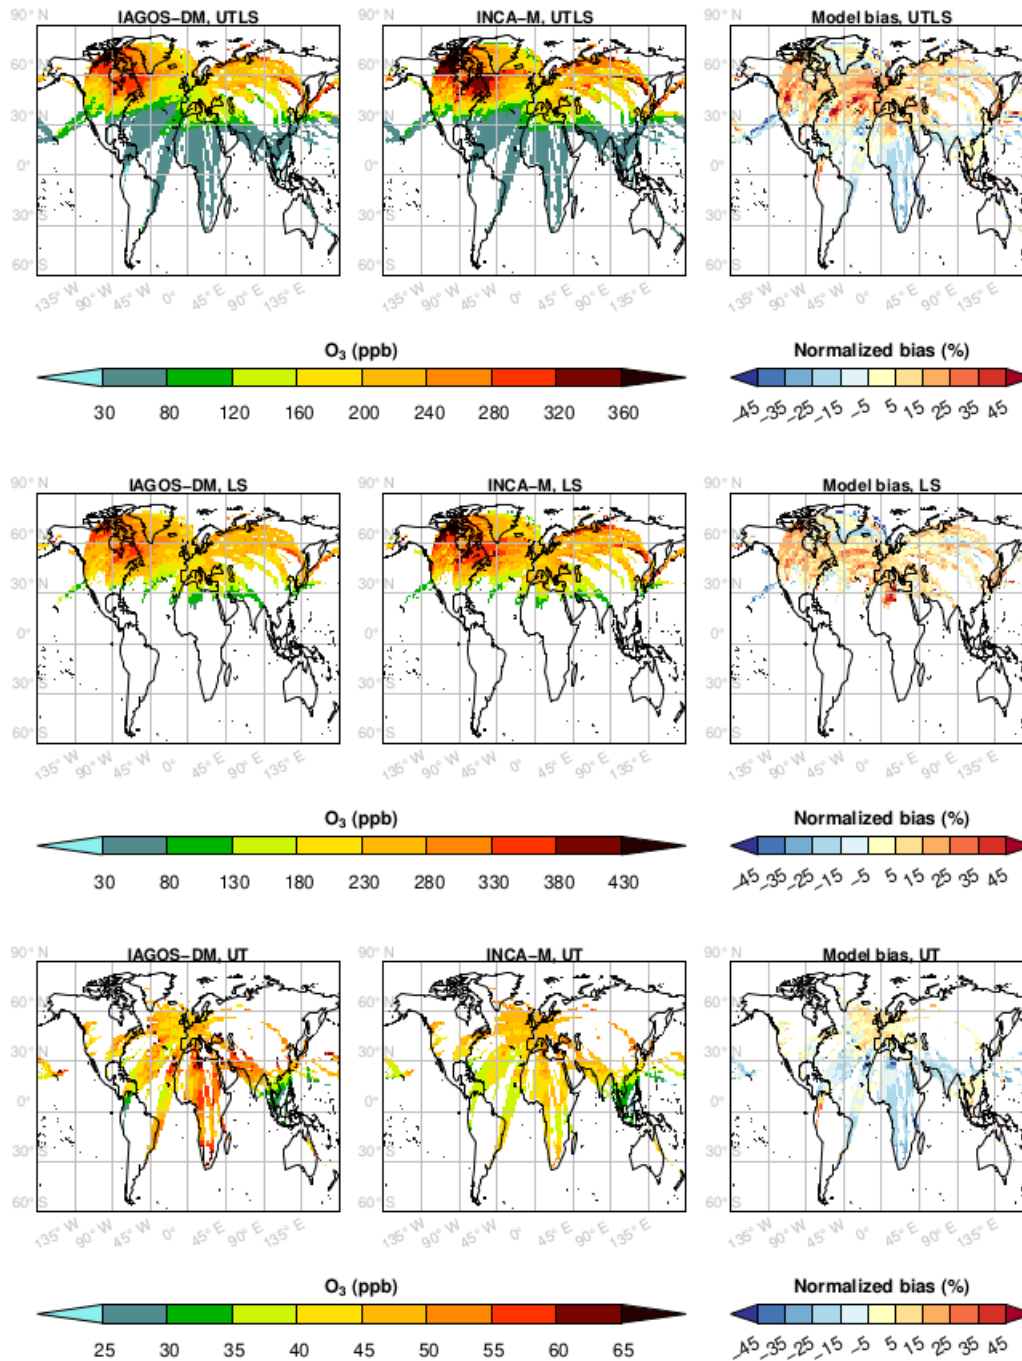

**Figure 1.** Ozone mean horizontal distributions during boreal winter from the end of 1994 until 2017, for the products IAGOS-DM (left) and INCA-M (middle), and the biases (right) normalized with respect to the mean values between the two products. Each row displays a layer, with the non-separated UTLS at the top and the distinct LS and UT below.

## O<sub>3</sub> – MAM

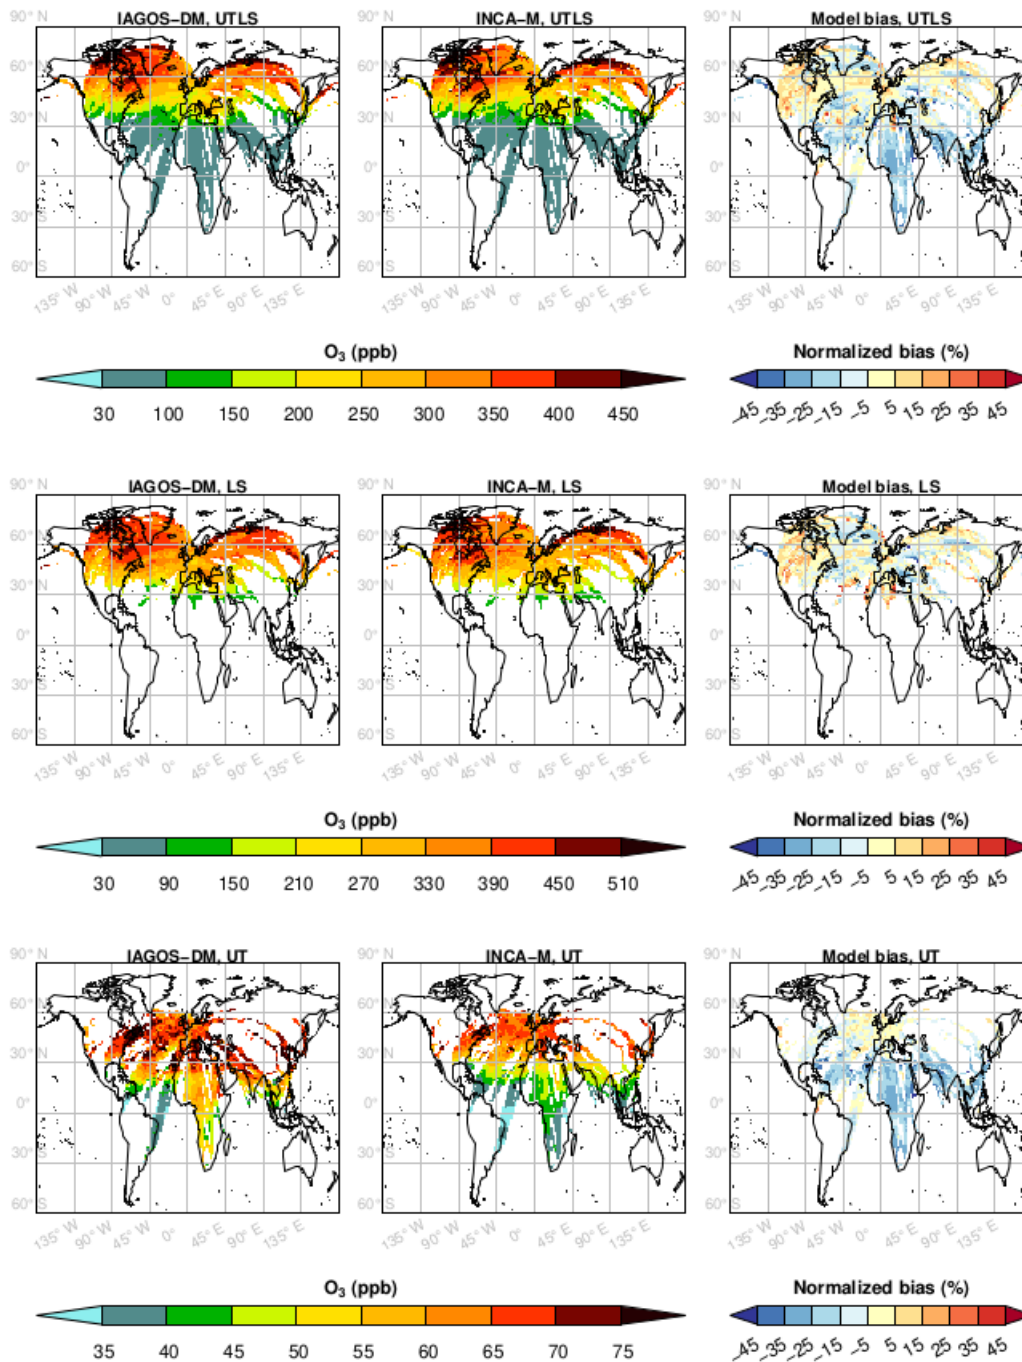

Figure 2. As Fig. 1 for boreal spring.

### O<sub>3</sub> - JJA

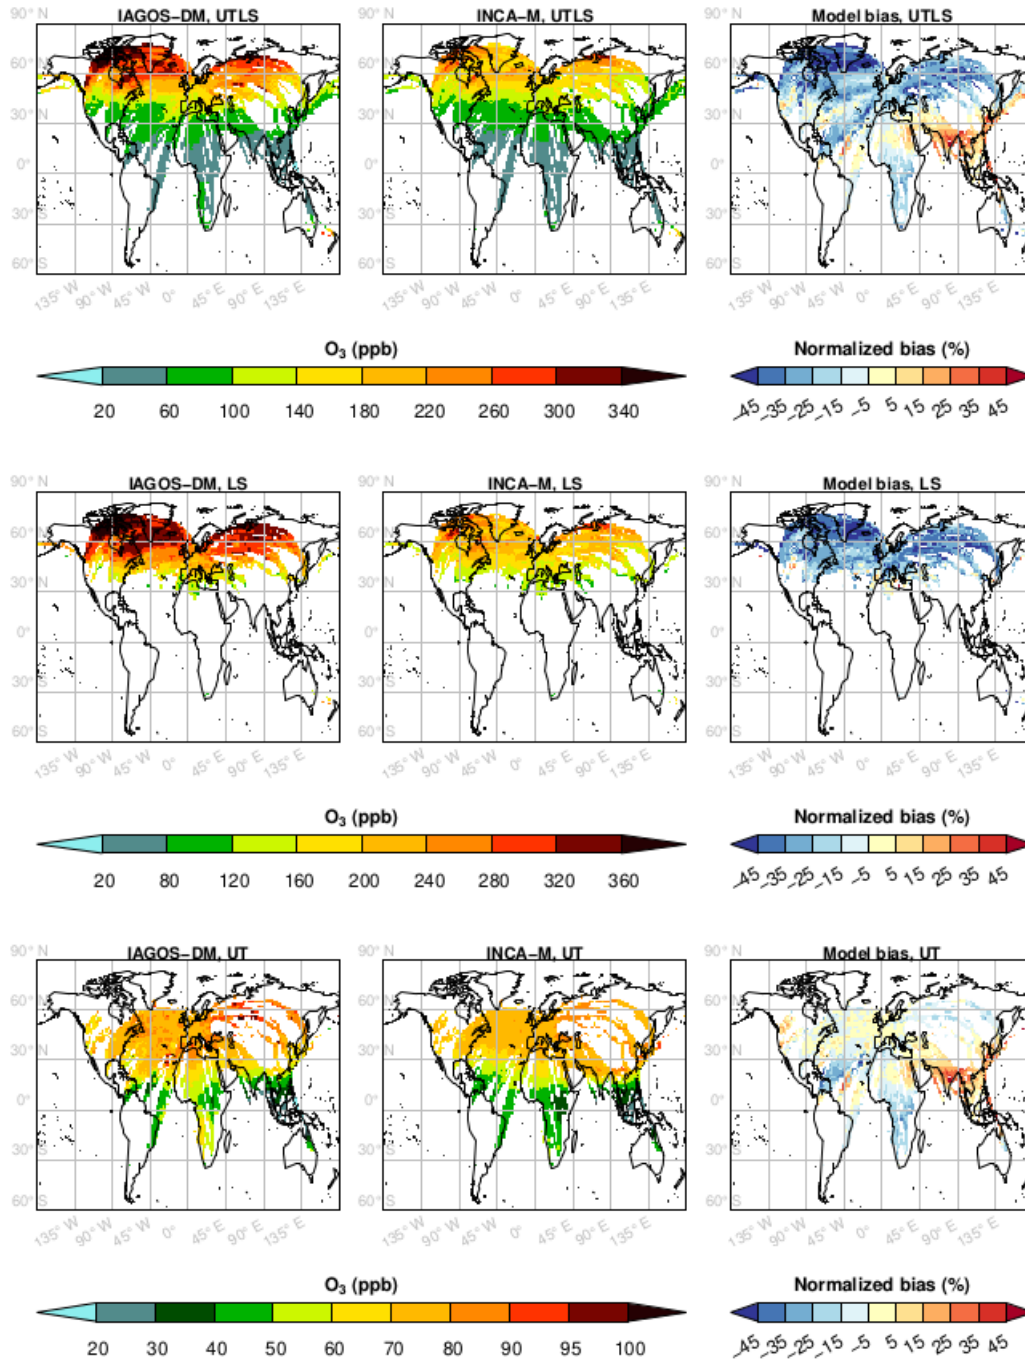

Figure 3. As Fig. 1 for boreal summer.

## 2 Carbon monoxide

# O<sub>3</sub> – SON

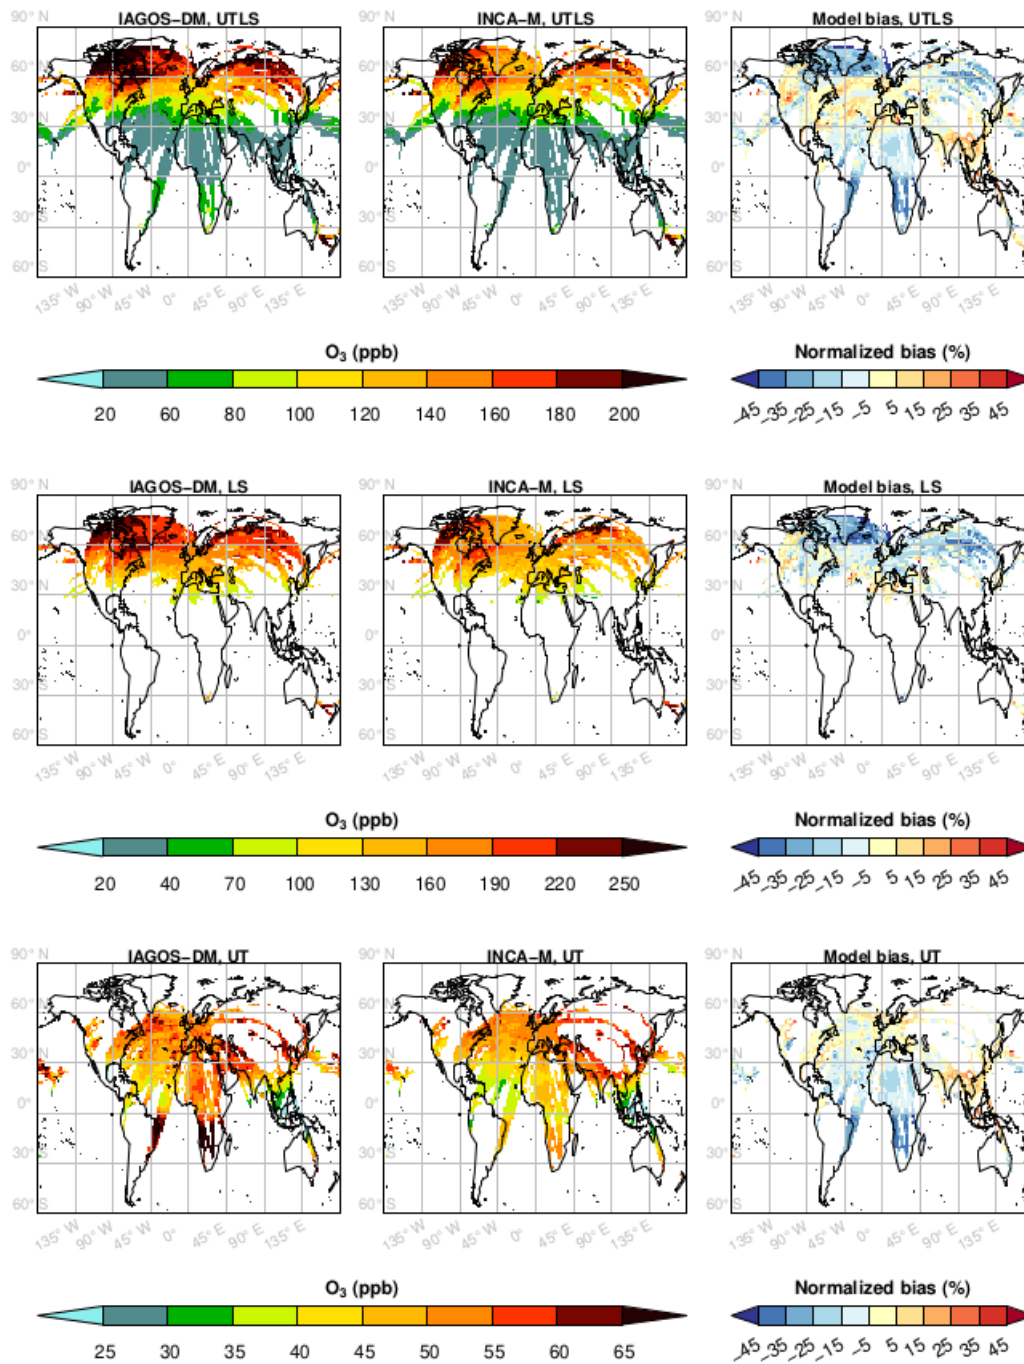

Figure 4. As Fig. 1 for boreal fall.



## CO - DJF

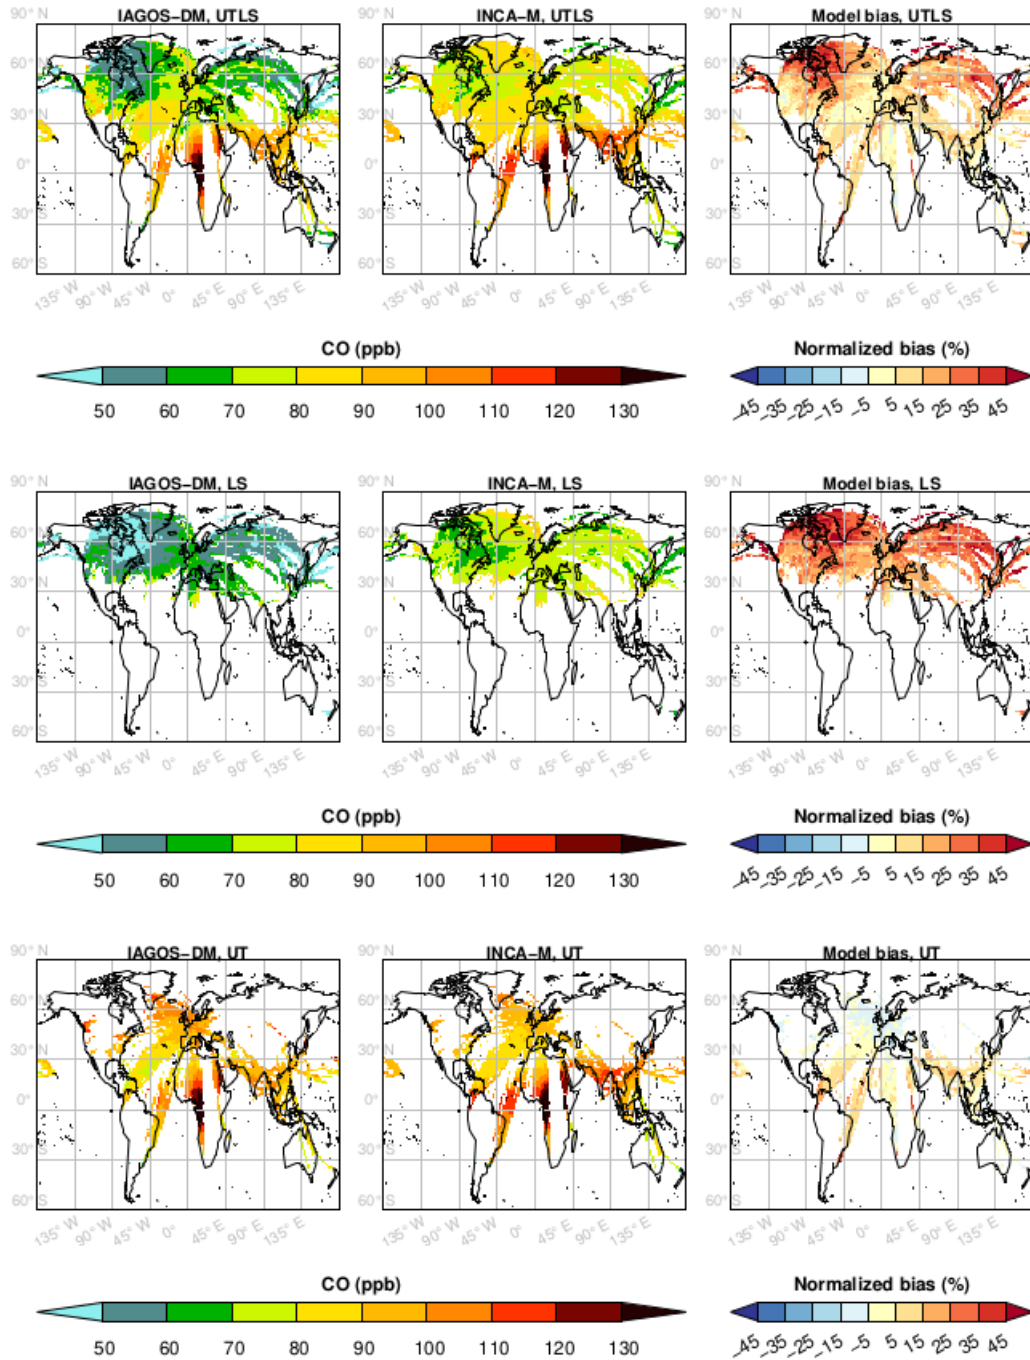

**Figure 5.** CO mean horizontal distributions during boreal winter from the end of 2001 until 2017, for the products IAGOS-DM (left) and INCA-M (middle), and the biases (right) normalized with respect to the mean values between the two products. Each row displays a layer, with the non-separated UTLS at the top and the distinct LS and UT below.

# CO - MAM

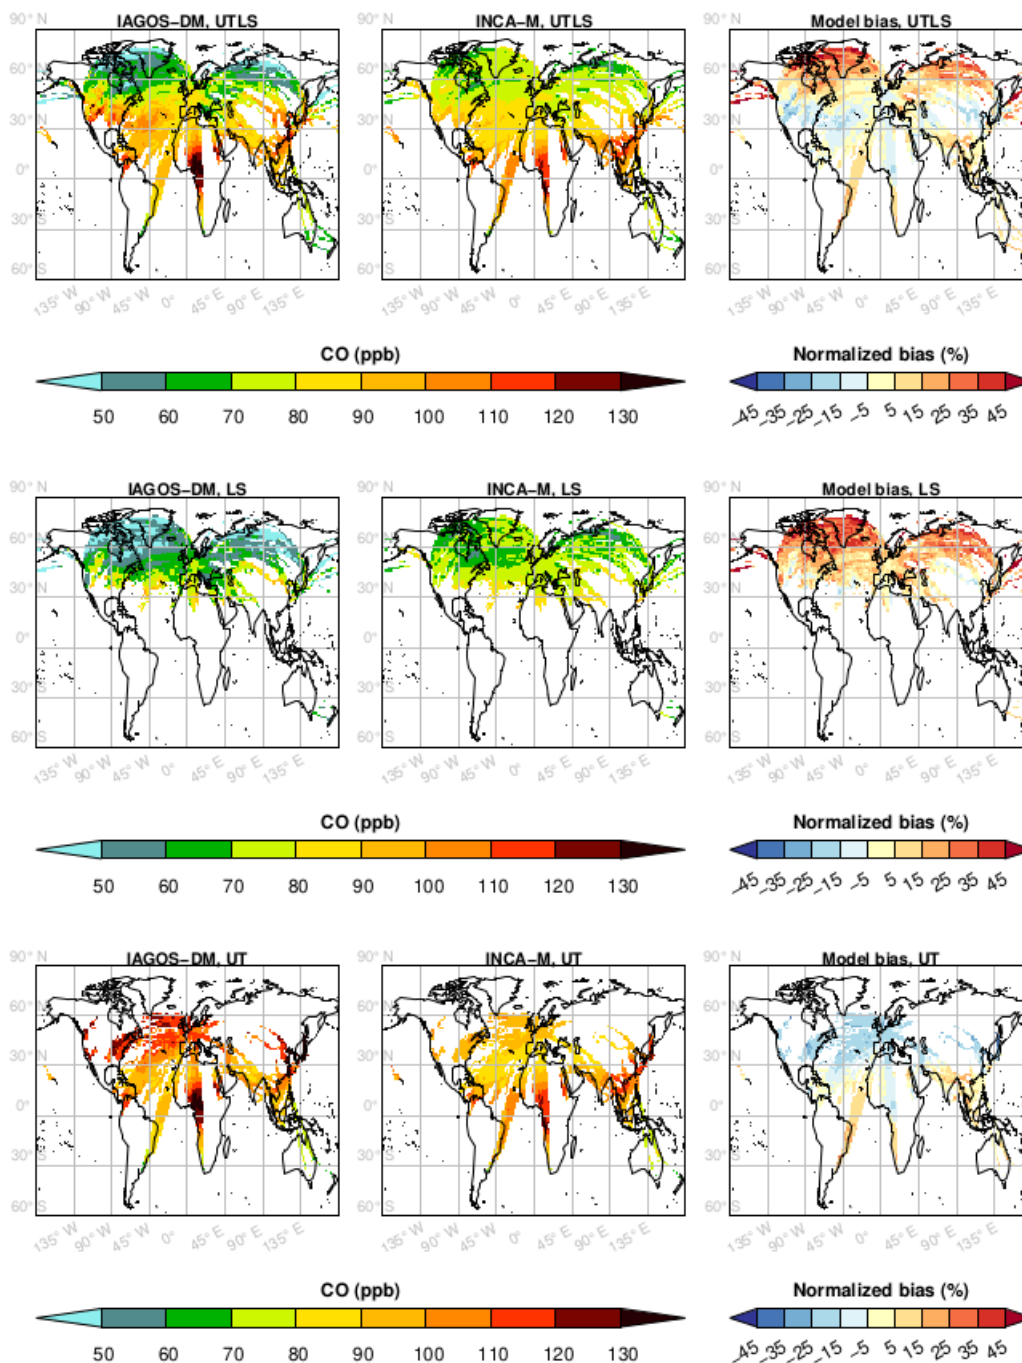

Figure 6. As Fig. 5 for boreal spring.



# CO - JJA

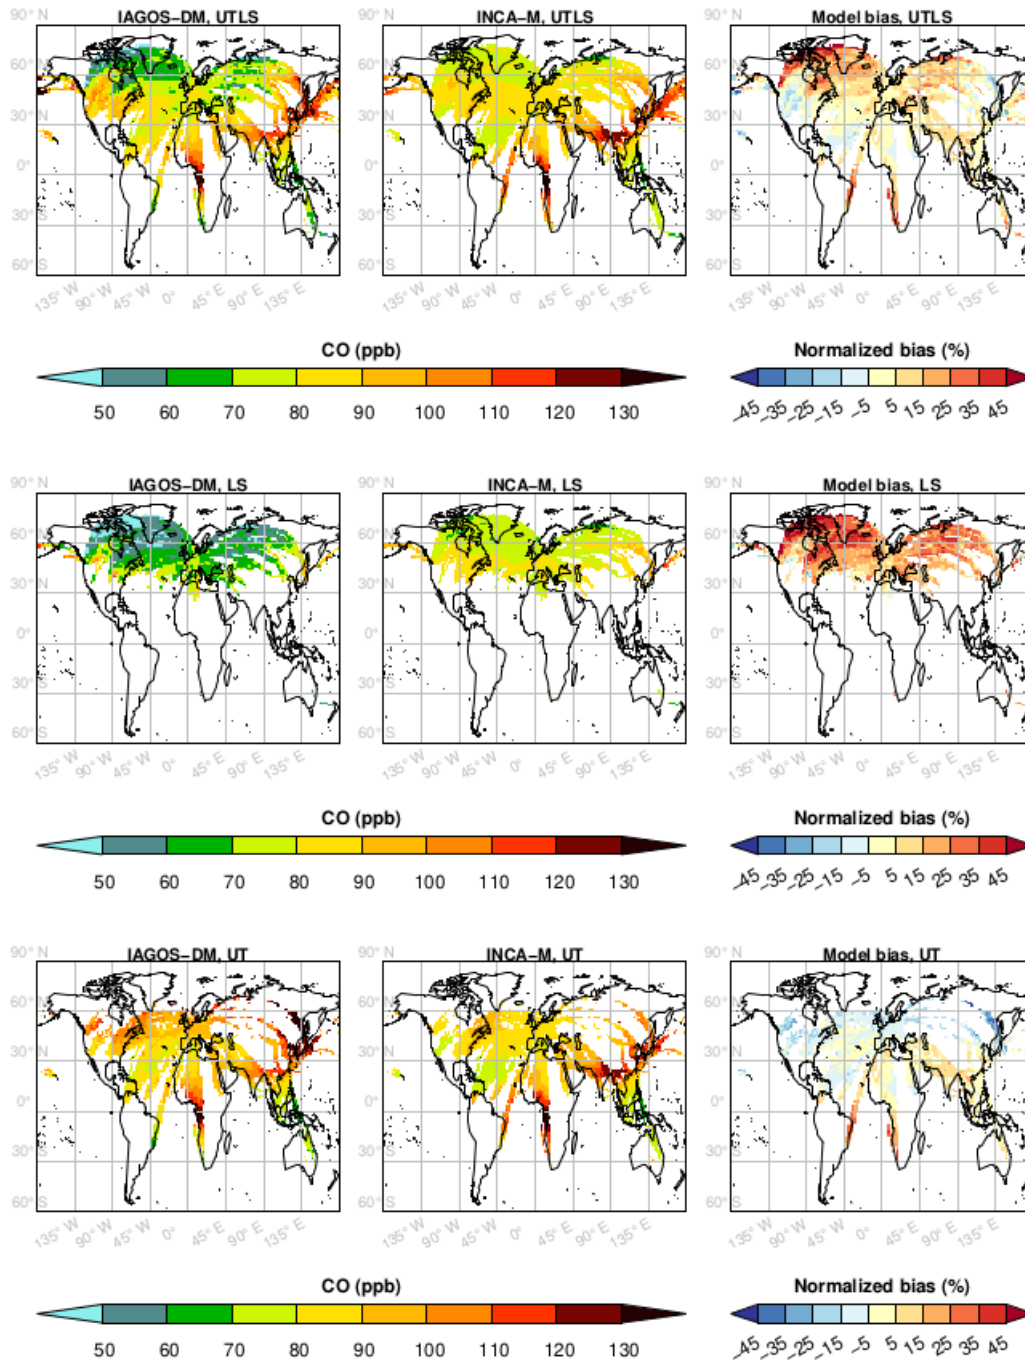

Figure 7. As Fig. 5 for boreal summer.

# CO - SON

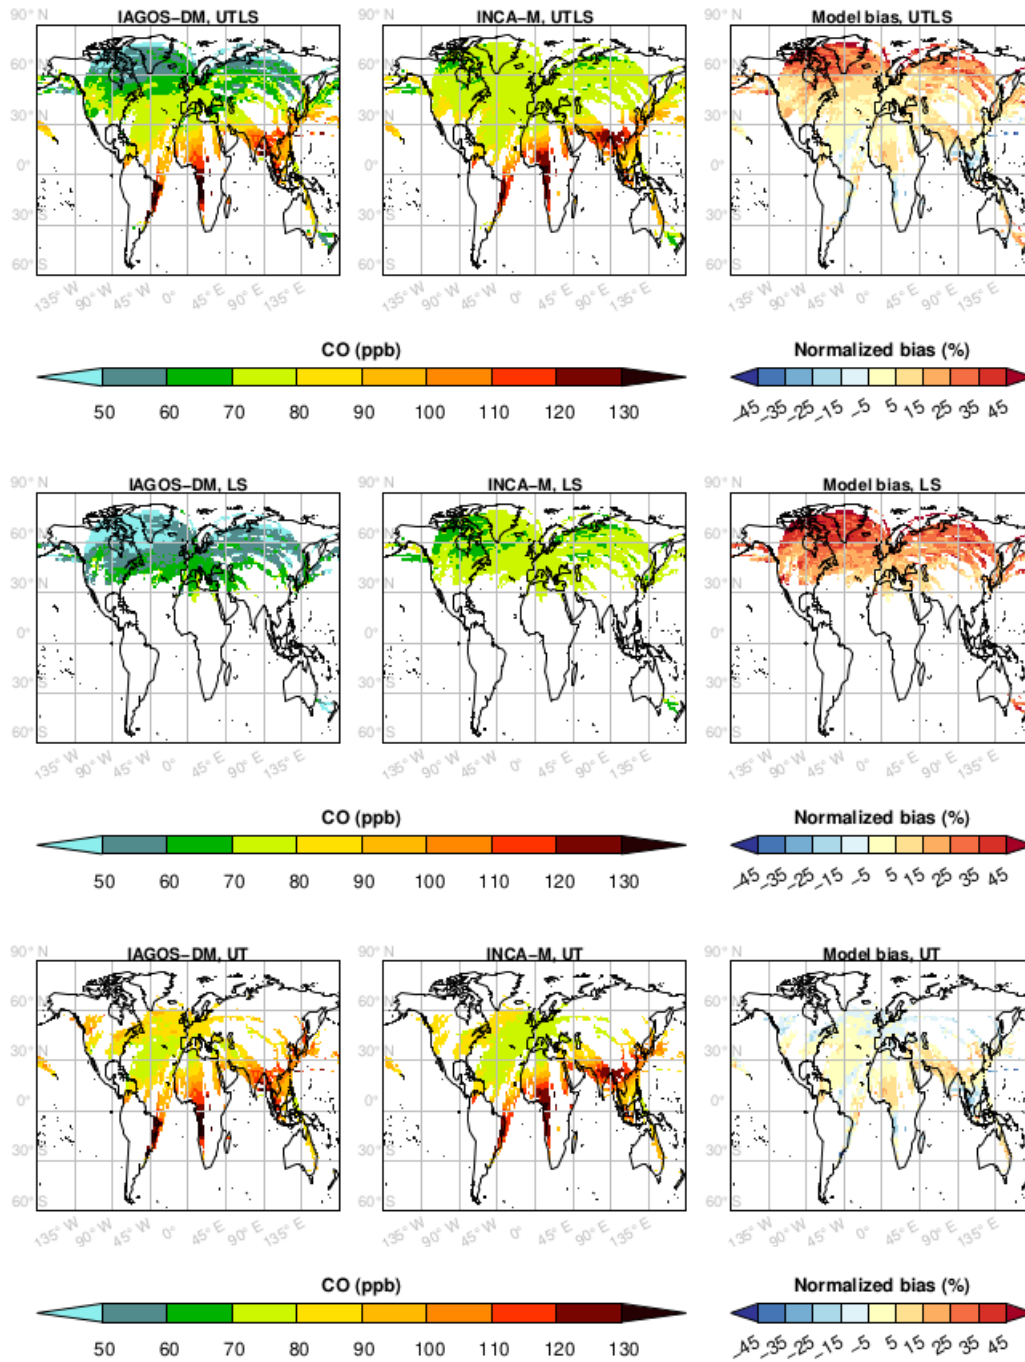

Figure 8. As Fig. 5 for boreal fall.

### **3 Reactive nitrogen**

## NO<sub>y</sub> – DJF

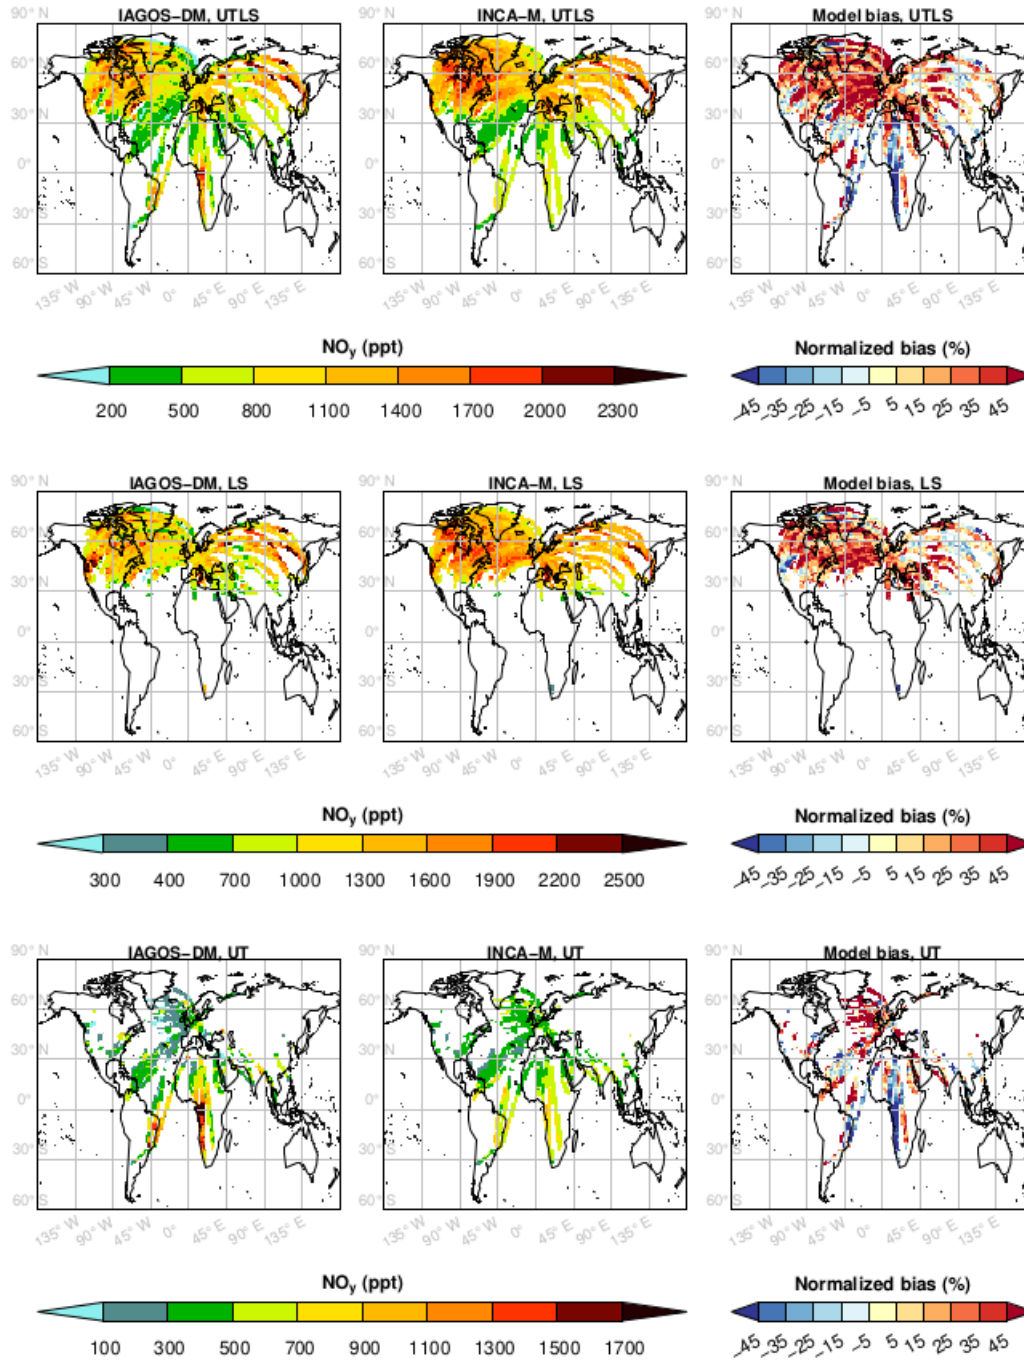

**Figure 9.**  $\text{NO}_y$  mean horizontal distributions during boreal winter from the end of 1999 until 2017, for the products IAGOS-DM (left) and INCA-M (middle), and the biases (right) normalized with respect to the mean values between the two products. Each row displays a layer, with the non-separated UTLS at the top and the distinct LS and UT below.

# NO<sub>y</sub> – MAM

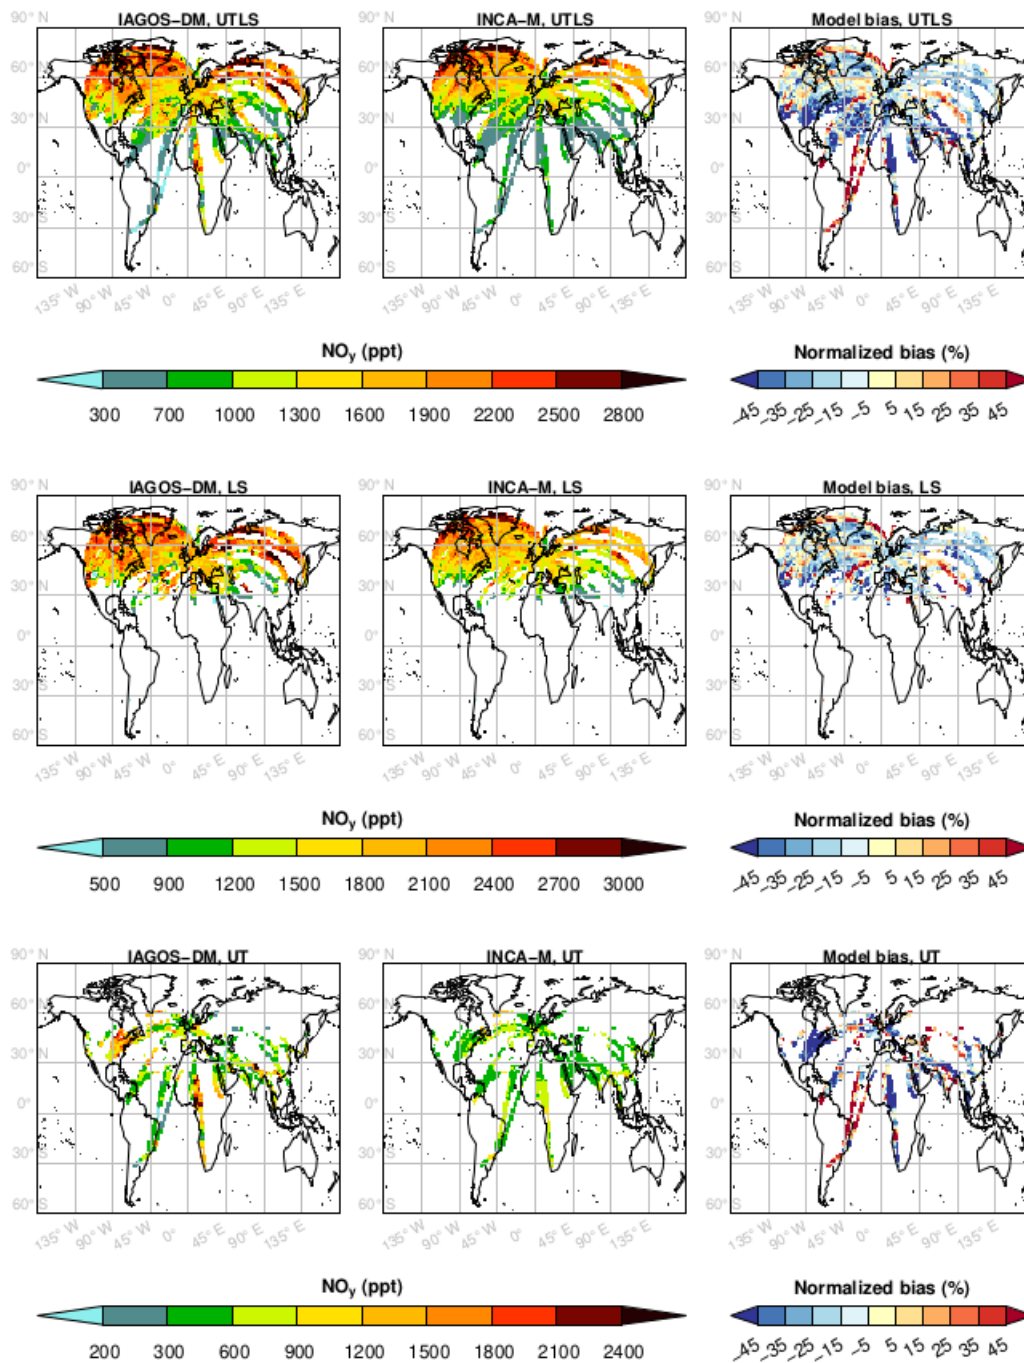

Figure 10. As Fig. 9 for boreal spring.



## NO<sub>y</sub> – JJA

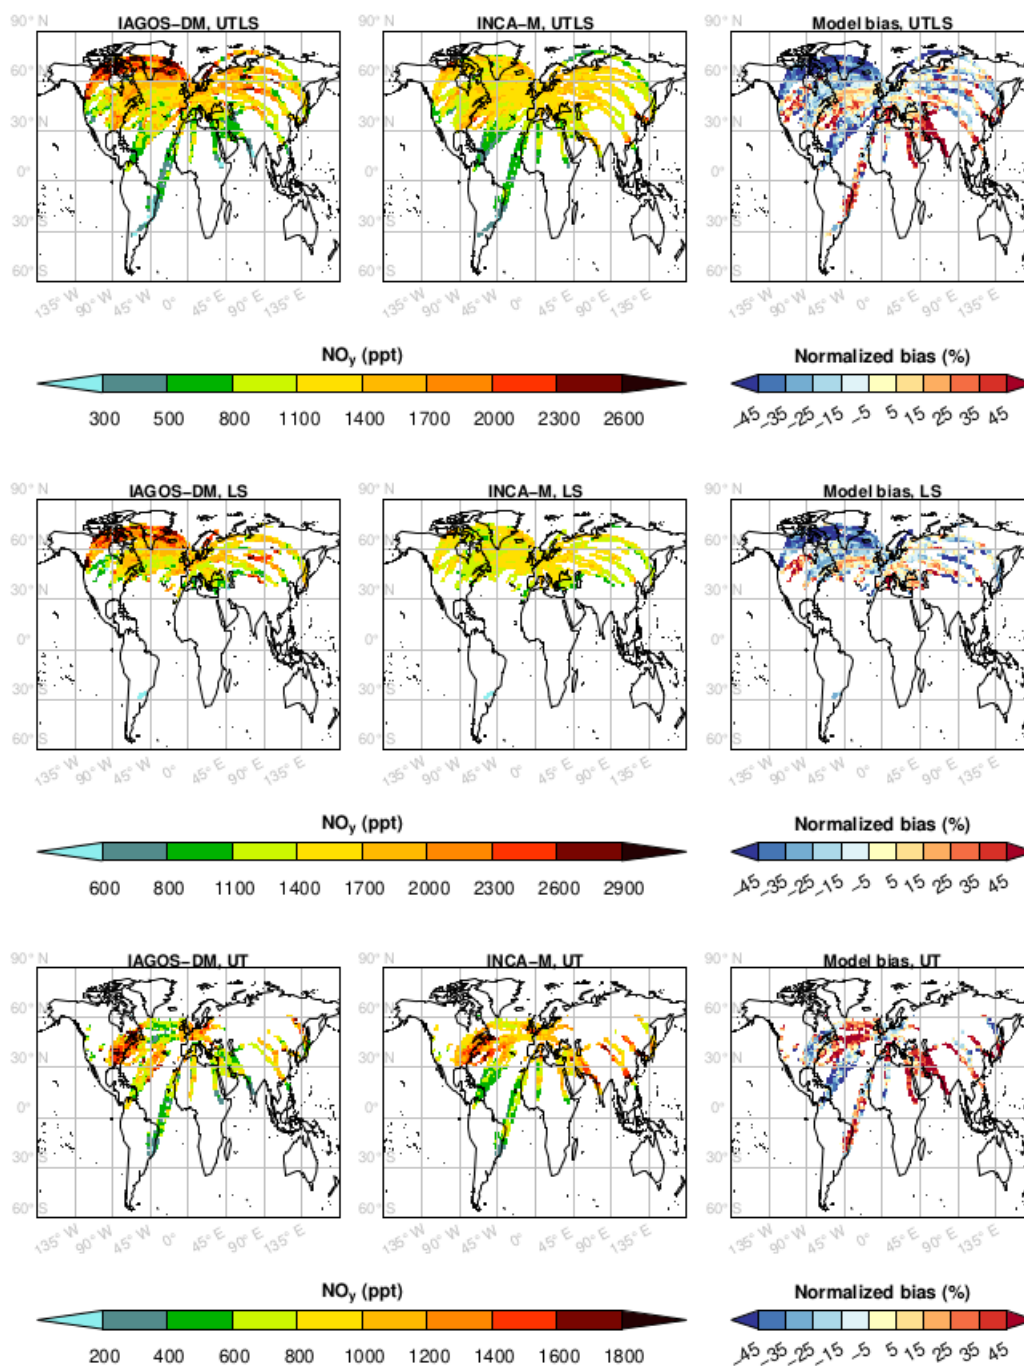

Figure 11. As Fig. 9 for boreal summer.



## 4 Water vapour

# NO<sub>y</sub> – SON

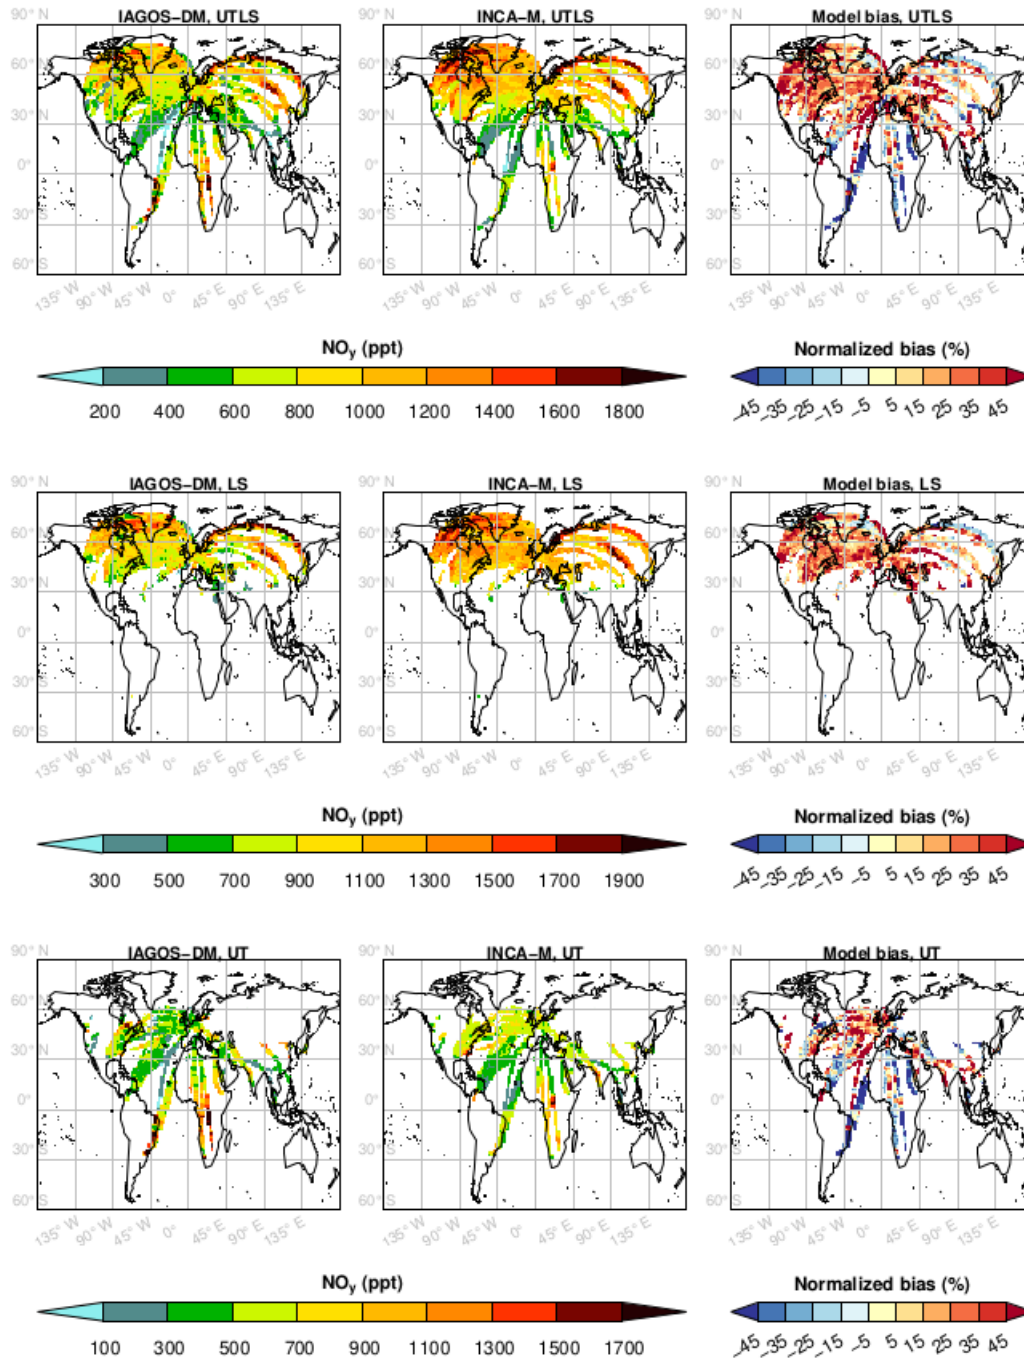

Figure 12. As Fig. 9 for boreal fall.

## H<sub>2</sub>O – DJF

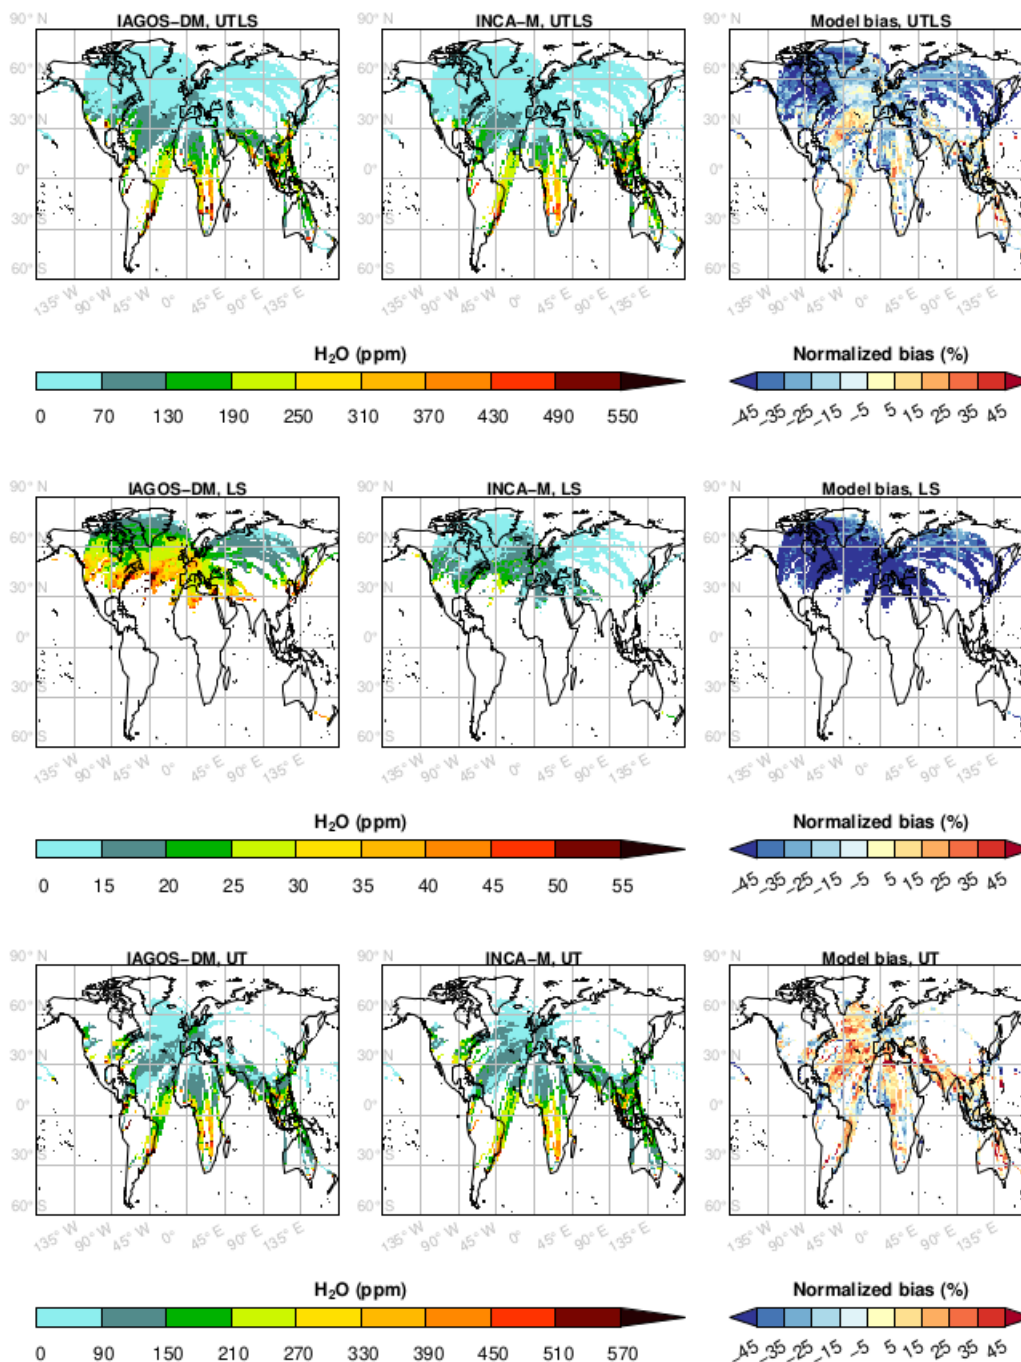

**Figure 13.** Water vapour mean horizontal distributions during boreal winter from the end of 1994 until 2017, for the products IAGOS-DM (left) and INCA-M (middle), and the biases (right) normalized with respect to the mean values between the two products. Each row displays a layer, with the non-separated UTLS at the top and the distinct LS and UT below. Please note that the LS climatology is representative of lower altitudes than for the other species, as explained in the manuscript.

## H<sub>2</sub>O – MAM

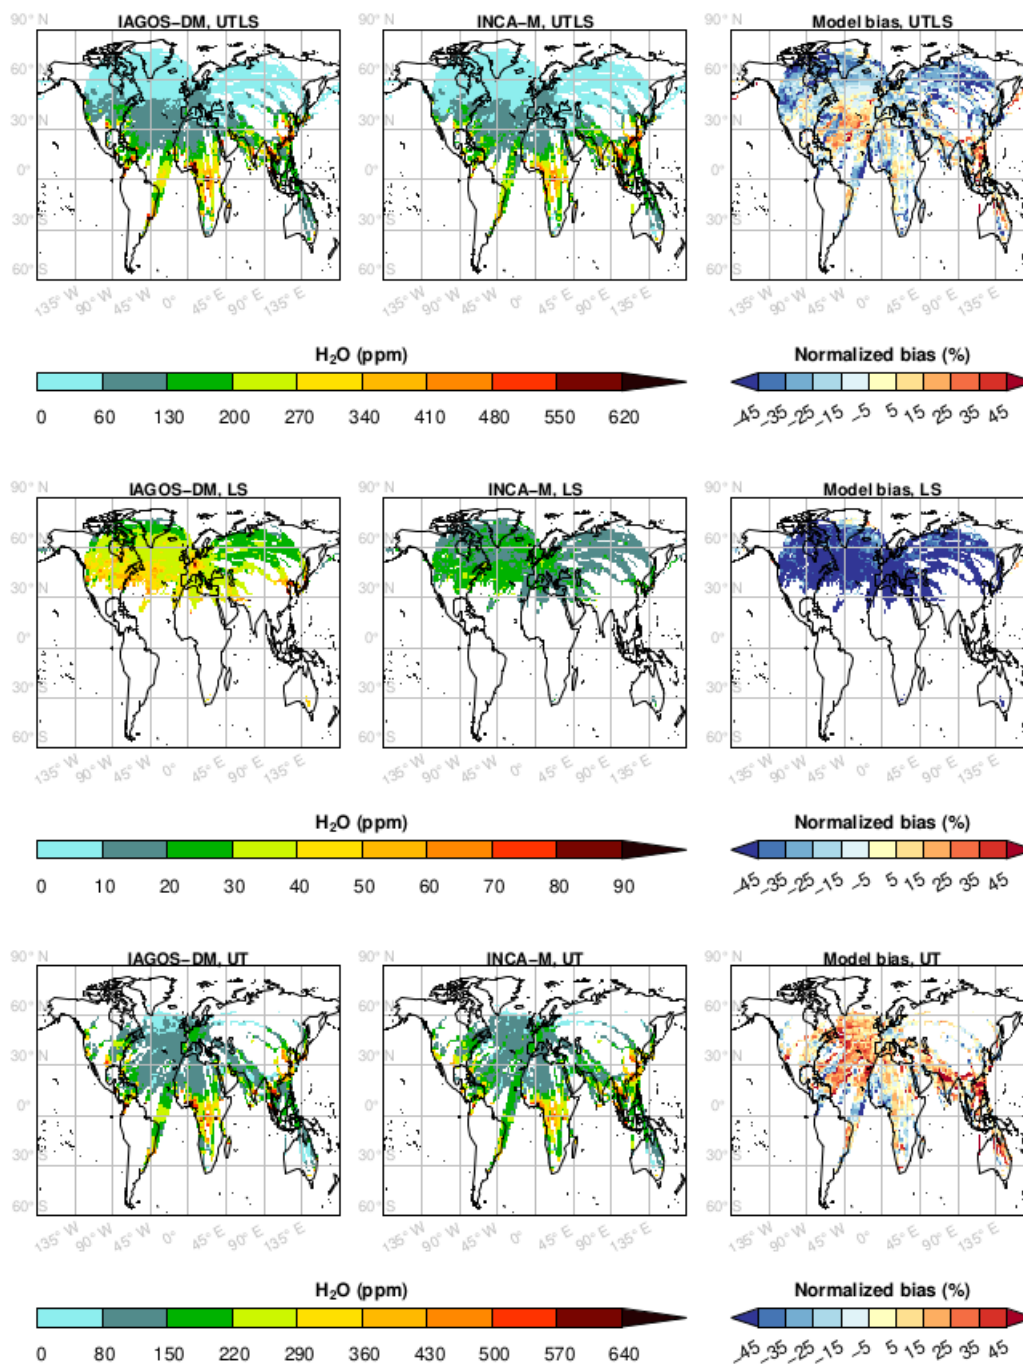

Figure 14. As Fig. 13 for boreal spring.

## H<sub>2</sub>O – JJA

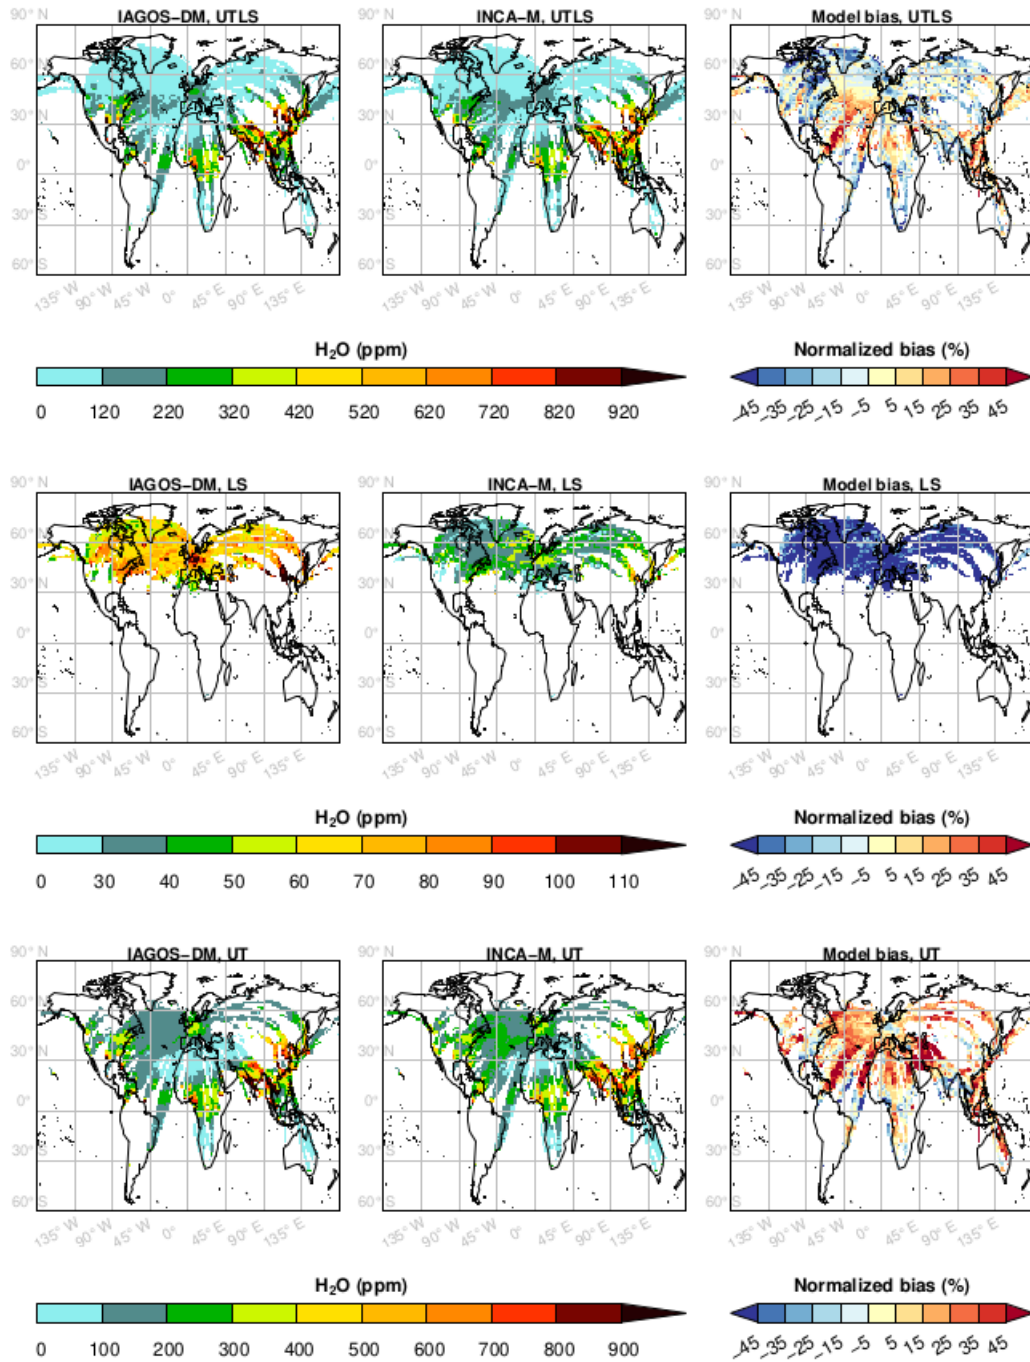

Figure 15. As Fig. 13 for boreal summer.



## H<sub>2</sub>O – SON

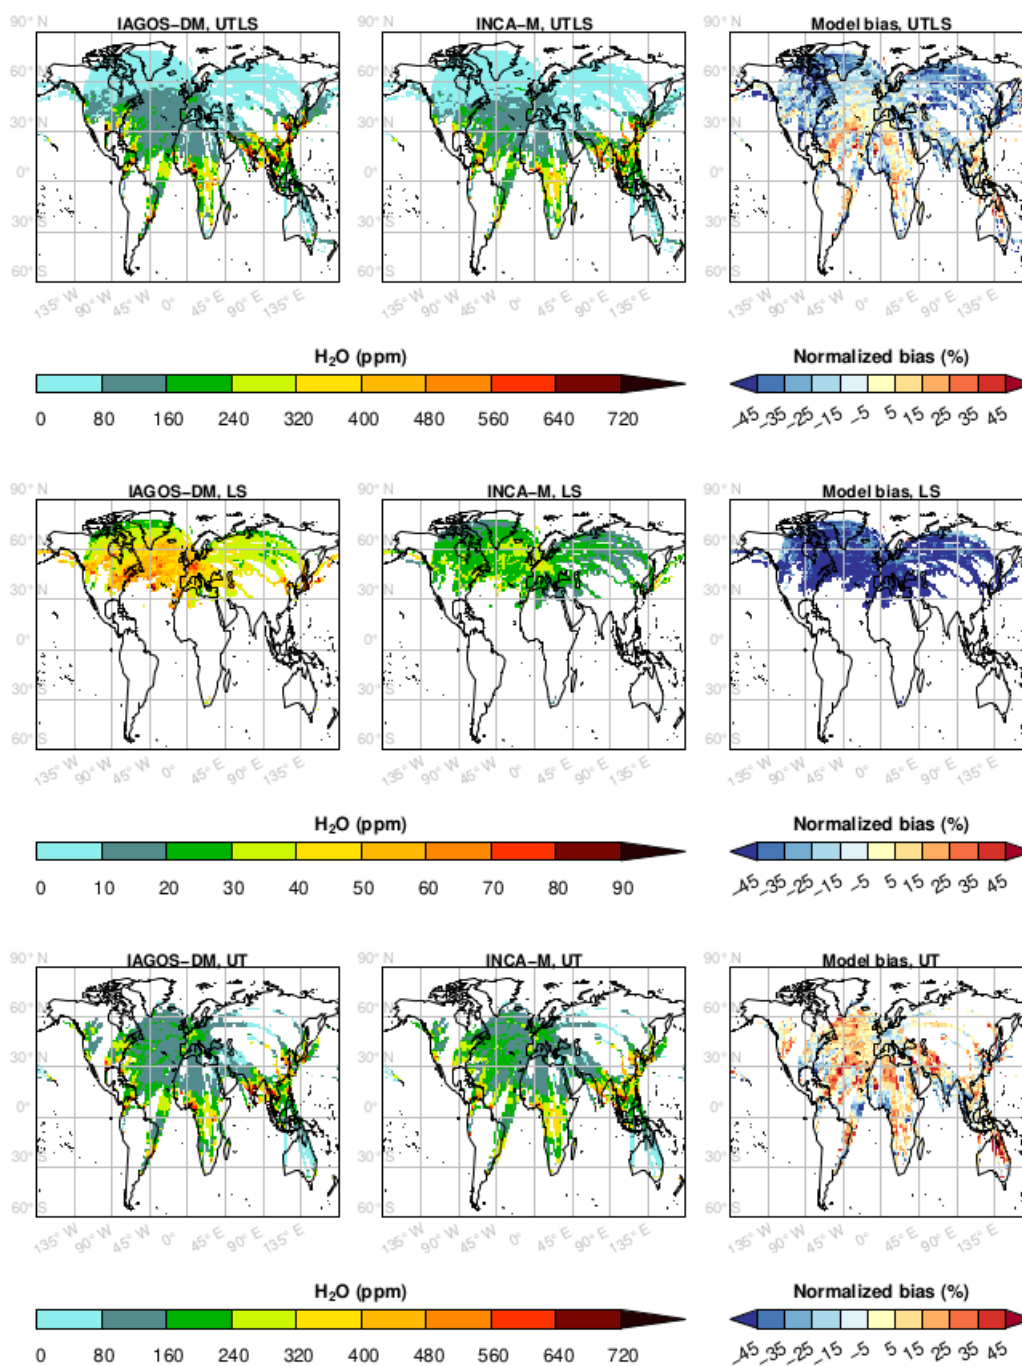

Figure 16. As Fig. 13 for boreal fall.
